# Supplementary material for: Enhanced adsorption behaviors of Co2+on robust chitosan hydrogel microspheres derived from an alkali solution system: kinetics and isotherm analysis
Source: Royal Society of Chemistry journal article supplement (doi:10.1039/c8ra06110f), 2018-01-01
Supplement: c8ra06110f1.pdf [file c8ra06110f1.pdf]

**Enhanced Adsorption Behaviors of Co<sup>2+</sup> on Robust Chitosan  
Hydrogel Microspheres Derived from Alkali Solution System:  
Kinetics and Isotherm Analysis**

Tianyu Hou<sup>1,2</sup>, Hongjiao Zhang<sup>1</sup>, Dongliang He<sup>1</sup>, Qingye Liu<sup>1,3\*</sup>,  
Zhijun Zhang<sup>1\*</sup>, Longqiang Xiao<sup>4\*</sup>, Wei Li<sup>3</sup>, Melanie Barnes<sup>5</sup>

1. School of Chemical Engineering and Technology, North University of China, NO. 3 Xueyuan Road, Jiancaoping District, Taiyuan 030051, China
2. CSIRO Food and Agriculture, GPO Box 1600 Canberra, ACT 2601, Australia
3. Department of Chemical Engineering, Texas Tech University, 6th Street and Canton Ave, P. O. Box 43121, Lubbock, Texas 79409, USA
4. School of Chemical Engineering, Fuzhou University, Fuzhou 350108, China
5. Geosciences Geoanalytical Laboratory, Texas Tech University, Lubbock, Texas 79409, USA

[\*] To whom correspondence and reprint requests should be addressed.  
E-mail: [qingyeliu@126.com](mailto:qingyeliu@126.com); [zjzhang@nuc.edu.cn](mailto:zjzhang@nuc.edu.cn); [xiaolq@fzu.edu.cn](mailto:xiaolq@fzu.edu.cn)

## Swelling and Degradation Behaviors in Different pH Conditions

The gravimetric method was employed to measure the swelling ratios of the chitosan hydrogel in different pH environment solutions (ionic strength was adjusted by adding 0.1 M NaCl solution). The swelling ratio (SR) was calculated as:

$$SR = \frac{W_s}{W_s - W_d} \times 100\% \quad (1)$$

where  $W_s$  is the weight of the swollen hydrogel and  $W_d$  is the weight of the dried chitosan gel. The weight maintaining ratio (WMR) was determined by using the equation:

$$WMR = \frac{W_{d,pH}}{W_{s,initial} \times \frac{W_{d,pH=7}}{W_{s,pH=7}}} \times 100\% \quad (2)$$

where  $W_{d,pH=7}$  and  $W_{s,pH=7}$  are the weight of the dried gel and the swollen hydrogel under the condition of pH=7 in water, respectively.  $W_{s,initial}$  is the initial weight of chitosan hydrogel before incubating in different pH aqueous solution,  $W_{d,pH}$  is the weight of dried chitosan gel after incubating in the corresponding pH aqueous solution for 48 h.

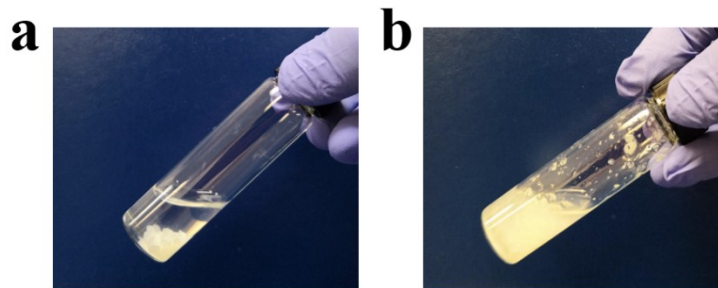

**Figure S1.** Photographs of the (a) chitosan and (b) A-chitosan hydrogel spheres after intense agitation in water. chitosan and A-chitosan indicated the chitosan pre-gel solutions derived from the alkaline and acetic acid solutions, respectively.

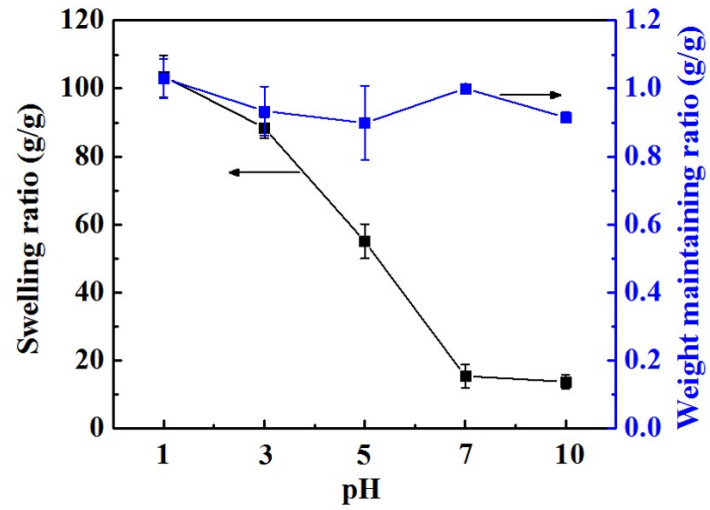

**Figure S2.** Swelling ratios and Weight maintaining ratios for chitosan hydrogel upon the 24-h incubation time in different pH solutions.

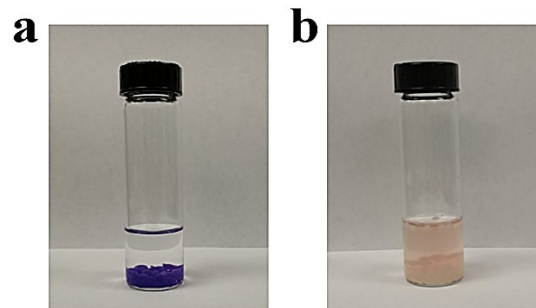

**Figure S3.** (a) Photographs of the chitosan hydrogel spheres after incubation in  $\text{Co}^{2+}$  alcohol solution for 24 h. (b) Desorption behavior for  $\text{Co}^{2+}$  loaded chitosan spheres in 0.1M EDTA aqueous solution.
